# Supplementary material
Source: ML conference proceedings conference paper supplement (https://proceedings.neurips.cc/paper_files/paper/2019/hash/2c601ad9d2ff9bc8b282670cdd54f69f-Abstract.html)
Supplement: Supplementary file [file 2c601ad9d2ff9bc8b282670cdd54f69f-Supplemental.zip]

## A Ablating All Heads but One: Additional Experiment.

Tables 5 and 6 report the difference in performance when only one head is kept for any given layer. The head is chosen to be the best head on its own on a *separate* dataset.

| Layer | Enc-Enc      | Enc-Dec       | Dec-Dec      |
|-------|--------------|---------------|--------------|
| 1     | <u>-1.96</u> | 0.02          | 0.03         |
| 2     | <u>-0.57</u> | 0.09          | -0.13        |
| 3     | <u>-0.45</u> | <u>-0.42</u>  | 0.00         |
| 4     | -0.30        | <u>-0.60</u>  | -0.31        |
| 5     | -0.32        | <u>-2.75</u>  | <u>-0.66</u> |
| 6     | <u>-0.67</u> | <u>-18.89</u> | -0.03        |

Table 5: Best delta BLEU by layer on newstest2014 when only the best head (as evaluated on newstest2013) is kept in the WMT model. Underlined numbers indicate that the change is statistically significant with  $p < 0.01$ .

| Layer |        | Layer |        |
|-------|--------|-------|--------|
| 1     | -0.01% | 7     | 0.05%  |
| 2     | -0.02% | 8     | -0.72% |
| 3     | -0.26% | 9     | -0.96% |
| 4     | -0.53% | 10    | 0.07%  |
| 5     | -0.29% | 11    | -0.19% |
| 6     | -0.52% | 12    | -0.15% |

Table 6: Best delta accuracy by layer on the validation set of MNLI-matched when only the best head (as evaluated on 5,000 training examples) is kept in the BERT model. None of these results are statistically significant with  $p < 0.01$ .

## B Additional Pruning Experiments

We report additional results for the importance-driven pruning approach from Section 4 on 4 additional datasets:

- **SST-2**: The GLUE version of the Stanford Sentiment Treebank (Socher et al., 2013). We use a fine-tuned BERT as our model.
- **CoLA**: The GLUE version of the Corpus of Linguistic Acceptability (Warstadt et al., 2018). We use a fine-tuned BERT as our model.
- **MRPC**: The GLUE version of the Microsoft Research Paraphrase Corpus (Dolan and Brockett, 2005). We use a fine-tuned BERT as our model.
- **IWSLT**: The German to English translation dataset from IWSLT 2014 (Cettolo et al., 2015). We use the same smaller model described in Section 6.

Figure 6 shows that in some cases up to 60% (SST-2) or 50% (CoLA, MRPC) of heads can be pruned without a noticeable impact on performance.

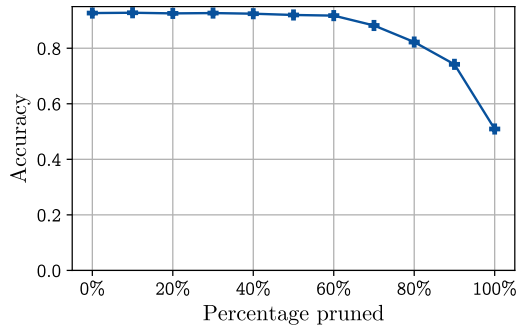

(a) Evolution of accuracy on the validation set of **SST-2** when heads are pruned from BERT according to  $I_h$ .

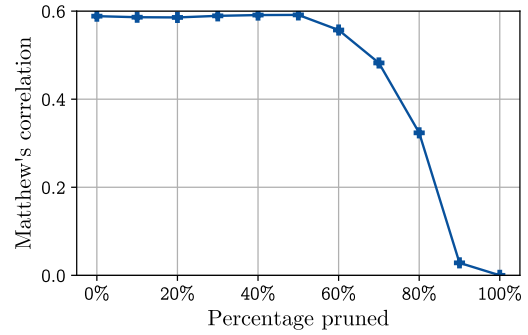

(b) Evolution of Matthew's correlation on the validation set of **CoLA** when heads are pruned from BERT according to  $I_h$ .

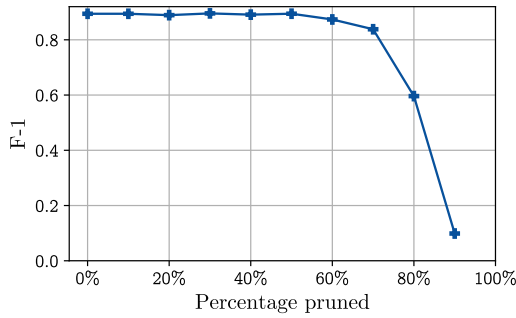

(c) Evolution of F-1 score on the validation set of **MRPC** when heads are pruned from BERT according to  $I_h$ .

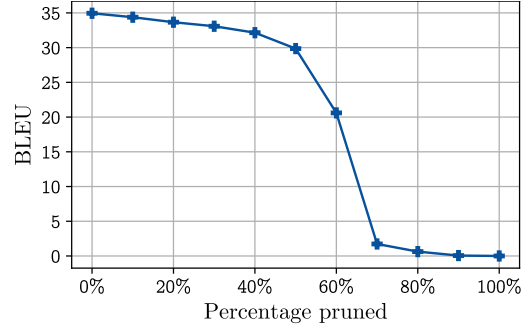

(d) Evolution of the BLEU score of our **IWSLT** model when heads are pruned according to  $I_h$  (solid blue).

Figure 6: Evolution of score by percentage of heads pruned.
